# Supplementary material for: The role of hydrazine in mixed fuels (H2O2/N2H4) for Au–Fe/Ni nanomotors
Source: Royal Society of Chemistry journal article supplement (doi:10.1039/c5ra08263c), 2015-01-01
Supplement: c5ra08263c1.pdf [file c5ra08263c1.pdf]

## Electronic Supplementary Information (ESI)

### ESI Videos

**ESI Video 1** An Au-Fe/Ni nanomotor rotate on its axis in a mixed fuel containing  $\text{H}_2\text{O}_2$  and  $\text{N}_2\text{H}_4$ .

**ESI Video 1'** The playback speed of ESI Video 1 is about twenty times slower.

**ESI Video 2** The flat rotation of an individual Fe/Ni nanomotor in a solution composed of  $\text{H}_2\text{O}_2$  and  $\text{N}_2\text{H}_4$ .

**ESI Video 2'** The playback speed of ESI Video 2 is about twenty times slower.

**ESI Video 3** The spiral motion of an Au-Fe/Ni nanomotor in a solution composed of  $\text{H}_2\text{O}_2$  and  $\text{N}_2\text{H}_4$ .

**ESI Video 3'** The playback speed of ESI Video 3 is forty times slower.

**ESI Video 4** The movement of a rodlike aggregation containing some particles in a solution composed of  $\text{H}_2\text{O}_2$  and  $\text{N}_2\text{H}_4$ .

**ESI Video 5** The motion of a disc-shaped aggregation including some particles in a solution composed of  $\text{H}_2\text{O}_2$  and  $\text{N}_2\text{H}_4$ .

## ESI Figures

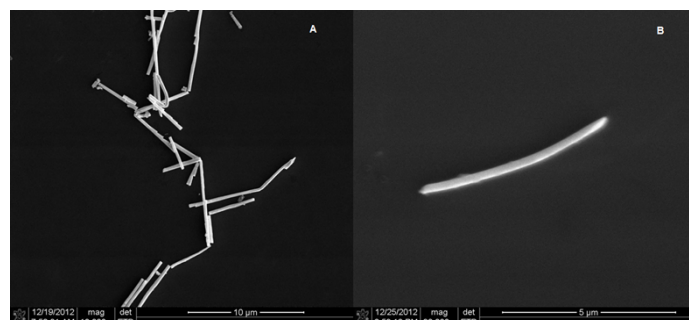

ESI Fig. 1 SEM images of Au-Fe/Ni nanomotors. Scale bars indicate 10  $\mu\text{m}$  (A) and 5  $\mu\text{m}$  (B).

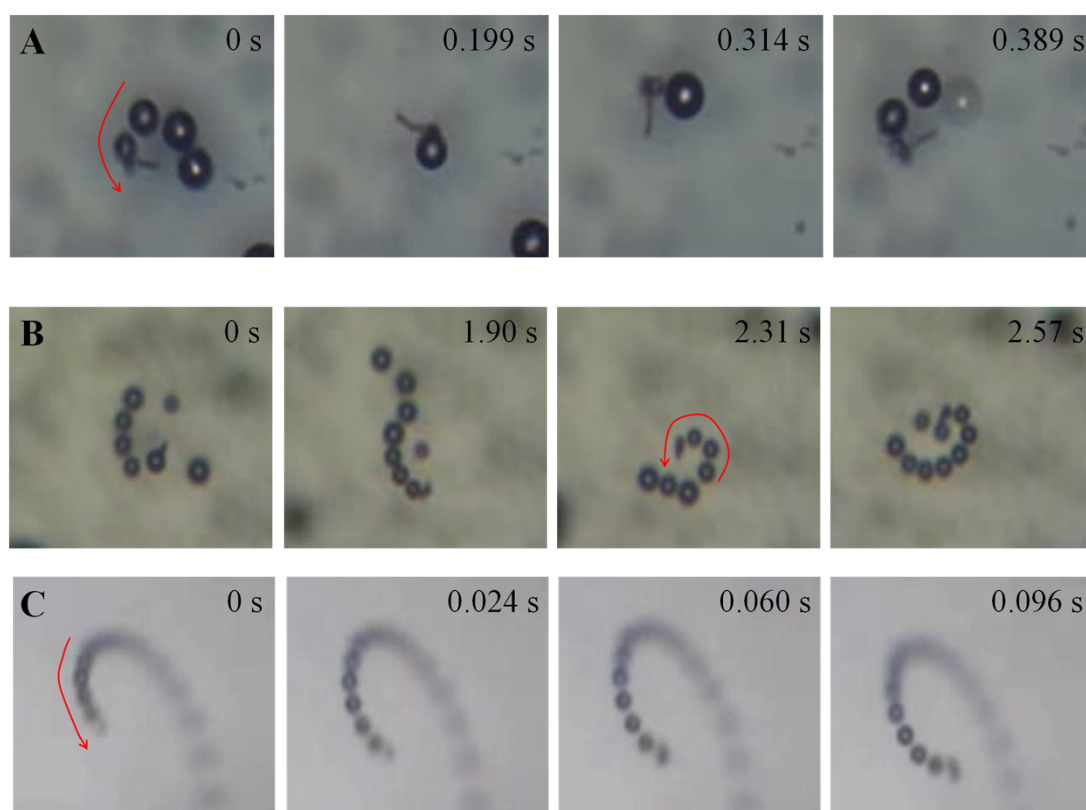

ESI Fig. 2 Images to describe an individual nanomotor (A) rotation on its axis; (B) flat rotation; (C) spiral motion.

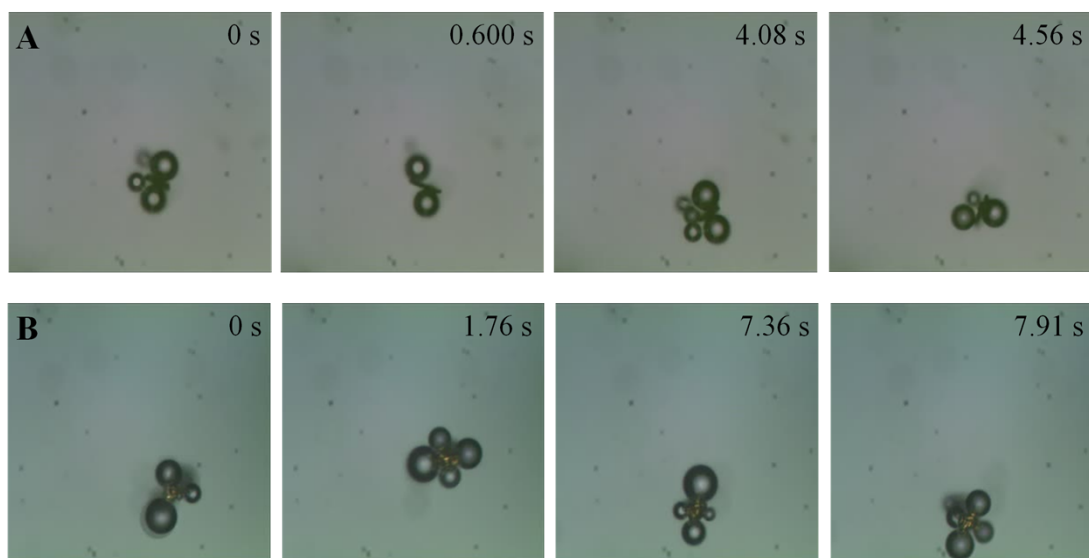

ESI Fig. 3 Images to describe the movement of (A) rodlike aggregation containing some particles; (B) disc-shaped aggregation including some particles
